# FOCUS

THE JOURNAL OF LIFELONG LEARNING IN PSYCHIATRY

## *Depression and Dysthymia*

*Guest Editors: Maurizio Fava, M.D.  
David P. Soskin, M.D.*

### IN CLINICAL SYNTHESIS:

The Inflammatory Hypothesis of Depression  
*David P. Soskin, M.D., et al.*

Dysthymic Disorder and Other Chronic Depressions  
*Mario A. Cristancho, M.D.  
James H. Kocsis, M.D.  
Michael E. Thase, M.D.*

Measurement-Based Care in the Treatment of Clinical Depression  
*David W. Morris, Ph.D.  
Marisa Toups, M.D.  
Madbukar H. Trivedi, M.D.*

The Long-Term Management of Major Depressive Disorders  
*Richard C. Shelton, M.D.  
Steven D. Hollon, Ph.D.*

Developments in Psychopharmacology for Major Depressive Disorder  
*Trina E. Chang, M.D., M.P.H.  
Stephen M. Stahl, M.D., Ph.D.*

AND INFLUENTIAL PUBLICATIONS...
