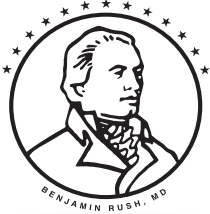

# APA Annual Meeting ON DEMAND

## FREE Third Generation iPad® with Purchase

APA Annual Meeting on Demand is a digital library of presentations from the 2012 American Psychiatric Association Annual Meeting. With **APA Annual Meeting on Demand**

you can watch over 300 hours of educational content presented at the annual meeting on your own schedule and in the comfort of your home, office or while traveling. Watch presenters' slides while listening to fully-synchronized audio as if you were actually attending each session.

### The new iPad® (a \$499 value)

Stunning Retina Display,  
Faster A5X processor,  
5MP iSight Camera  
(16GB with WiFi)

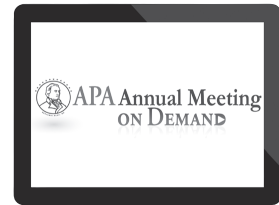

[www.CMEonCall.com/apa/Journal](http://www.CMEonCall.com/apa/Journal)

Features of **APA Annual Meeting on Demand** include:

- Online access to content immediately after purchase
- **NEW:** Convenient USB drive with access to the APA Annual Meeting on Demand library for offline viewing
- Streaming content for viewing on mobile technology including iPad®, and iPhone® devices
- Downloadable MP3 files for convenient on-the-go audio (*listen in the car, or on your MP3 player*)
- Over 50 Additional CME Credits Available

iPad® supplies are limited, so order TODAY at

[www.CMEonCall.com/apa/Journal](http://www.CMEonCall.com/apa/Journal)

Or call (818) 844-3299,  
Toll Free (800) 501-2303

2012 PHILADELPHIA

**Statement of Ownership, Management, and Circulation  
PS Form 3526 (All Periodicals Publications Except Requester Publications)**

|                                                                                                                                                                                                                                                                                                                                                                                                                                                                                                                                                                                |  |                                                       |                         |                                                                                 |
|--------------------------------------------------------------------------------------------------------------------------------------------------------------------------------------------------------------------------------------------------------------------------------------------------------------------------------------------------------------------------------------------------------------------------------------------------------------------------------------------------------------------------------------------------------------------------------|--|-------------------------------------------------------|-------------------------|---------------------------------------------------------------------------------|
| <b>1. Publication Title</b><br>FOCUS                                                                                                                                                                                                                                                                                                                                                                                                                                                                                                                                           |  | <b>2. Publication Number</b><br>21577                 | <b>ISSN</b><br>15414094 | <b>3. Filing Date</b><br>09/28/2012                                             |
| <b>4. Issue Frequency</b><br>QUARTERLY                                                                                                                                                                                                                                                                                                                                                                                                                                                                                                                                         |  | <b>5. Number of Issues Published Annually</b><br>4    |                         | <b>6. Annual Subscription Price</b><br>\$ 505.00                                |
| <b>7. Complete Mailing Address of Known Office of Publication</b><br>1000 WILSON BLVD., STE 1825<br>ARLINGTON, ARLINGTON, VA 22209-3924                                                                                                                                                                                                                                                                                                                                                                                                                                        |  |                                                       |                         | <b>Contact Person</b><br>ROGER DOMRAS<br><br><b>Telephone</b><br>(703) 907-8544 |
| <b>8. Complete Mailing Address of Headquarters or General Business Office of Publisher</b><br>1000 WILSON BLVD., STE 1825<br>ARLINGTON, VA 22209-3924                                                                                                                                                                                                                                                                                                                                                                                                                          |  |                                                       |                         |                                                                                 |
| <b>9. Full Names and Complete Mailing Addresses of Publisher, Editor, and Managing Editor</b>                                                                                                                                                                                                                                                                                                                                                                                                                                                                                  |  |                                                       |                         |                                                                                 |
| <b>Publisher (Name and complete mailing address)</b><br>REBECCA RINEHART<br>1000 WILSON BLVD., STE 1825<br>ARLINGTON, VA 22209-3924                                                                                                                                                                                                                                                                                                                                                                                                                                            |  |                                                       |                         |                                                                                 |
| <b>Editor (Name and complete mailing address)</b><br>DEBORAH HALES, MD<br>1000 WILSON BLVD., STE 1825<br>ARLINGTON, VA 22209-3924                                                                                                                                                                                                                                                                                                                                                                                                                                              |  |                                                       |                         |                                                                                 |
| <b>Managing Editor (Name and complete mailing address)</b><br>MICHAEL ROY<br>1000 WILSON BLVD., STE 1825<br>ARLINGTON, VA 22209-1825                                                                                                                                                                                                                                                                                                                                                                                                                                           |  |                                                       |                         |                                                                                 |
| <b>10. Owner (Do not leave blank. If the publication is owned by a corporation, give the name and address of the corporation immediately followed by the names and addresses of all stockholders owning or holding 1 percent or more of the total amount of stock. If not owned by a corporation, give names and addresses of the individual owners. If owned by a partnership or other unincorporated firm, give its name and address as well as those of each individual owner. If the publication is published by a nonprofit organization, give its name and address.)</b> |  |                                                       |                         |                                                                                 |
| <b>Full Name</b>                                                                                                                                                                                                                                                                                                                                                                                                                                                                                                                                                               |  | <b>Complete Mailing Address</b>                       |                         |                                                                                 |
| AMERICAN PSYCHIATRIC ASSOC                                                                                                                                                                                                                                                                                                                                                                                                                                                                                                                                                     |  | 1000 WILSON BLVD., STE 1825, ARLINGTON, VA 22209-3924 |                         |                                                                                 |
|                                                                                                                                                                                                                                                                                                                                                                                                                                                                                                                                                                                |  |                                                       |                         |                                                                                 |
|                                                                                                                                                                                                                                                                                                                                                                                                                                                                                                                                                                                |  |                                                       |                         |                                                                                 |
|                                                                                                                                                                                                                                                                                                                                                                                                                                                                                                                                                                                |  |                                                       |                         |                                                                                 |
| <b>11. Known Bondholders, Mortgagees, and Other Security Holders Owning or Holding 1 Percent or More of Total Amount of Bonds, Mortgages, or Other Securities. If none, check box</b> <input type="checkbox"/> None                                                                                                                                                                                                                                                                                                                                                            |  |                                                       |                         |                                                                                 |
| <b>Full Name</b>                                                                                                                                                                                                                                                                                                                                                                                                                                                                                                                                                               |  | <b>Complete Mailing Address</b>                       |                         |                                                                                 |
| AMERICAN PSYCHIATRIC ASSOC                                                                                                                                                                                                                                                                                                                                                                                                                                                                                                                                                     |  | 1000 WILSON BLVD., STE 1825, ARLINGTON, VA 22209-3924 |                         |                                                                                 |
|                                                                                                                                                                                                                                                                                                                                                                                                                                                                                                                                                                                |  |                                                       |                         |                                                                                 |
|                                                                                                                                                                                                                                                                                                                                                                                                                                                                                                                                                                                |  |                                                       |                         |                                                                                 |
|                                                                                                                                                                                                                                                                                                                                                                                                                                                                                                                                                                                |  |                                                       |                         |                                                                                 |

PS Form 3526, September 2007 (Page 1)

PRIVACY NOTICE: See our privacy policy on [www.usps.com](http://www.usps.com)

|                                                                                                                                                                                                                                                                                                                                                        |                                                                                                                                                                    |                                                                 |                                                                    |
|--------------------------------------------------------------------------------------------------------------------------------------------------------------------------------------------------------------------------------------------------------------------------------------------------------------------------------------------------------|--------------------------------------------------------------------------------------------------------------------------------------------------------------------|-----------------------------------------------------------------|--------------------------------------------------------------------|
| <b>13. Publication Title</b><br>FOCUS                                                                                                                                                                                                                                                                                                                  |                                                                                                                                                                    | <b>14. Issue Date for Circulation Data Below</b><br>04/01/2012  |                                                                    |
| <b>15. Extend and Nature of Circulation</b>                                                                                                                                                                                                                                                                                                            |                                                                                                                                                                    | <b>Average No. Copies Each Issue During Preceding 12 Months</b> | <b>No. Copies of Single Issue Published Nearest to Filing Date</b> |
| <b>a. Total Numbers of Copies (Net press run)</b>                                                                                                                                                                                                                                                                                                      |                                                                                                                                                                    | 2844                                                            | 2905                                                               |
| <b>b. Paid Circulation (By Mail and Outside the Mail)</b>                                                                                                                                                                                                                                                                                              | (1) Mailed Outside County Paid Subscriptions Stated on PS Form 3541 (include paid distribution above nominal rate, advertiser's proof copies, and exchange copies) | 2088                                                            | 1911                                                               |
|                                                                                                                                                                                                                                                                                                                                                        | (2) Mailed In-County Paid Subscriptions Stated on PS Form 3541 (include paid distribution above nominal rate, advertiser's proof copies, and exchange copies)      | 0                                                               | 0                                                                  |
|                                                                                                                                                                                                                                                                                                                                                        | (3) Paid Distribution Outside the Mails Including Sales Through Dealers and Carriers, Street Vendors, Counter Sales, and Other Paid Distribution Outside USPS      | 127                                                             | 107                                                                |
|                                                                                                                                                                                                                                                                                                                                                        | (4) Paid Distribution by Other Classes of Mail Through the USPS (e.g. First-Class Mail)                                                                            | 0                                                               | 0                                                                  |
| <b>c. Total Paid Distribution (Sum of 15b (1), (2), (3), (4))</b>                                                                                                                                                                                                                                                                                      |                                                                                                                                                                    | 2215                                                            | 2018                                                               |
| <b>d. Free or Nominal Rate Distribution (By Mail and Outside the Mail)</b>                                                                                                                                                                                                                                                                             | (1) Free or Nominal Rate Outside County Copies included on PS Form 3541                                                                                            | 0                                                               | 0                                                                  |
|                                                                                                                                                                                                                                                                                                                                                        | (2) Free or Nominal Rate In-County Copies included on PS Form 3541                                                                                                 | 0                                                               | 0                                                                  |
|                                                                                                                                                                                                                                                                                                                                                        | (3) Free or Nominal Rate Copies Mailed at Other Classes Through the USPS (e.g. First-Class Mail)                                                                   | 0                                                               | 0                                                                  |
|                                                                                                                                                                                                                                                                                                                                                        | (4) Free or Nominal Rate Distribution Outside the Mail (Carriers or other means)                                                                                   | 333                                                             | 431                                                                |
| <b>e. Total Free or Nominal Rate Distribution (Sum of 15d (1), (2), (3), (4))</b>                                                                                                                                                                                                                                                                      |                                                                                                                                                                    | 333                                                             | 431                                                                |
| <b>f. Total Distribution (Sum of 15c and 15e)</b>                                                                                                                                                                                                                                                                                                      |                                                                                                                                                                    | 2548                                                            | 2449                                                               |
| <b>g. Copies not Distributed</b>                                                                                                                                                                                                                                                                                                                       |                                                                                                                                                                    | 296                                                             | 456                                                                |
| <b>h. Total (Sum of 15f and 15g)</b>                                                                                                                                                                                                                                                                                                                   |                                                                                                                                                                    | 2844                                                            | 2905                                                               |
| <b>i. Percent Paid ((15c / 15f) times 100)</b>                                                                                                                                                                                                                                                                                                         |                                                                                                                                                                    | 86.93 %                                                         | 82.40 %                                                            |
| <b>16. Publication of Statement of Ownership</b>                                                                                                                                                                                                                                                                                                       |                                                                                                                                                                    |                                                                 |                                                                    |
| <input checked="" type="checkbox"/> If the publication is a general publication, publication of this statement is required. Will be printed in the 10/01/2012 issue of this publication. <input type="checkbox"/> Publication not required.                                                                                                            |                                                                                                                                                                    |                                                                 |                                                                    |
| <b>17. Signature and Title of Editor, Publisher, Business Manager, or</b>                                                                                                                                                                                                                                                                              |                                                                                                                                                                    | <b>Title</b>                                                    | <b>Date</b>                                                        |
| KATHY STEIN                                                                                                                                                                                                                                                                                                                                            |                                                                                                                                                                    | FINANCE DIRECTOR                                                | 09/28/2012 07:57:35 AM                                             |
| I certify that all information furnished on this form is true and complete. I understand that anyone who furnishes false or misleading information on this form or who omits material or information requested on the form may be subject to criminal sanctions (including fines and imprisonment) and/or civil sanctions (including civil penalties). |                                                                                                                                                                    |                                                                 |                                                                    |

PS Form 3526, September 2007 (Page 2)

PRIVACY NOTICE: See our privacy policy on [www.usps.com](http://www.usps.com)

# PsychiatryOnline.org

Your Destination for Lifelong Learning in Psychiatry

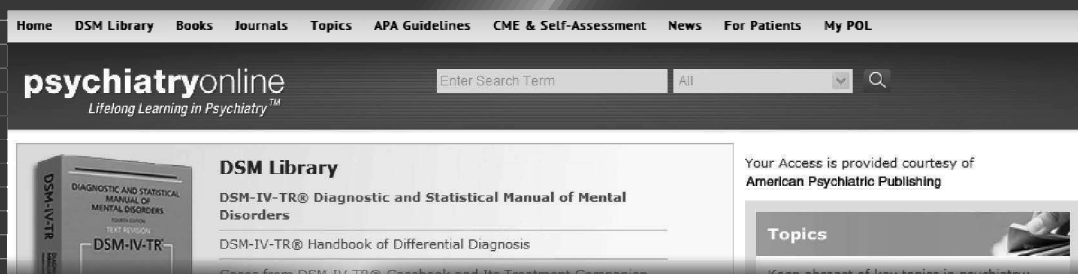

Your one-stop resource for information on diagnosis, treatment, guidelines, the latest research, and breaking news from the field. From one single location users can access:

- **DSM-IV-TR® Library**
- **Books**
- **Practice Guidelines**
- **CME & Self-Assessments**
- **Journals:**
  - *American Journal of Psychiatry*
  - *Psychiatric Services*
  - *Journal of Neuropsychiatry and Clinical Neurosciences*
  - *Academic Psychiatry*
  - *FOCUS: The Lifelong Learning Journal in Psychiatry*
  - *Plus Psychiatric News*

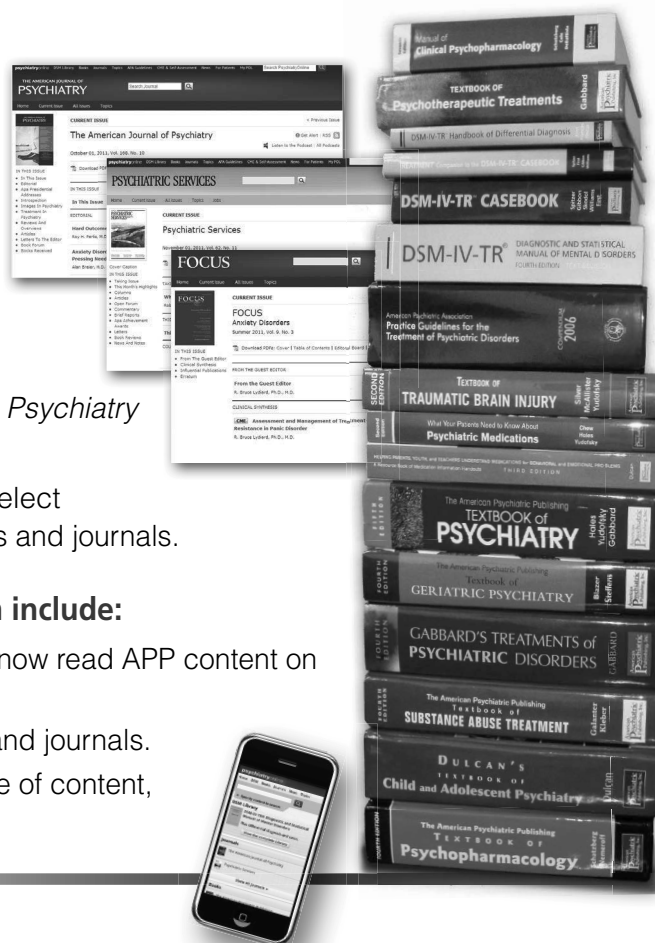

Subscribe to products individually or to the DSM Select package that includes the DSM-IV-TR® library, books and journals.

## Features of the new PsychiatryOnline platform include:

- A new mobile interface for smartphones. You can now read APP content on your mobile devices.
- Global search and browse options across books and journals.
- Tools that help you filter search results by title, type of content, topic and/or date.
- Customizable interface.

Interested in an institutional subscription? Please contact us at [institutions@psych.org](mailto:institutions@psych.org) or call 1-800-368-5777 ext. 8538 or 703-907-8538 for more information and a subscription rate quote.

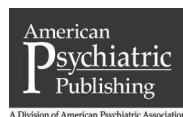

The First and Last Word in Psychiatry

American Psychiatric Publishing • [www.appi.org](http://www.appi.org) • [focus.psychiatryonline.org](http://focus.psychiatryonline.org)  
Phone: 1-800-368-5777 • Email: [appi@psych.org](mailto:appi@psych.org)
